# Supplementary material for: An integrated pipeline for prediction of Clostridioides difficile infection
Source: Springer Nature journal article supplement (doi:10.1038/s41598-023-41753-7), 2023-10-02

**eFigure1. Functional annotation of rs2227306 and PheWAS results reported from UKBiobank data.**

**a.** eQTL data V7 release was downloaded from GTEx Portal (<https://gtexportal.org/home/>); pQTL data generated from human plasma proteome was downloaded from Somalogic Box. **b.** Open Targets Genetics ([www.OpenTargets.org](http://www.OpenTargets.org)) for PheWAS from UKbiobank and other publications.

**a**

| Gene       | Overall V2G | Distance (Canonical TSS) | pQTL (Sun, 2018) | eQTL | Enhancer-TSS corr (FANTOM5) | DHS-promoter corr (Thurman, 2012) | PChI-C (Jung, 2019) | VEP (Ensembl)  |
|------------|-------------|--------------------------|------------------|------|-----------------------------|-----------------------------------|---------------------|----------------|
| CXCL8      | 0.281       | 797                      |                  | 0.9  |                             |                                   |                     | intron_variant |
| PF4V1      | 0.272       | 111958                   | 0.1              | 1    |                             |                                   |                     |                |
| CXCL6      | 0.190       | 95302                    |                  | 0.6  |                             |                                   |                     |                |
| CXCL5      | 0.154       | 257339                   |                  | 0.6  |                             |                                   | 0.1                 |                |
| CXCL1      | 0.145       | 128055                   |                  | 0.4  |                             |                                   |                     |                |
| UMLILO     | 0.091       | 31036                    |                  |      |                             |                                   |                     |                |
| RASSF6     | 0.073       | 120707                   |                  |      |                             |                                   |                     |                |
| PF4        | 0.054       | 240786                   |                  |      |                             |                                   |                     |                |
| PPBP       | 0.054       | 246852                   |                  |      |                             |                                   |                     |                |
| LINC02499  | 0.054       | 232535                   |                  |      |                             |                                   |                     |                |
| CXCL3      | 0.045       | 297469                   |                  |      |                             |                                   |                     |                |
| AFM        | 0.045       | 259593                   |                  |      |                             |                                   |                     |                |
| AFP        | 0.036       | 310200                   |                  |      |                             |                                   |                     |                |
| ALB        | 0.036       | 344224                   |                  |      |                             |                                   |                     |                |
| MTHFD2L    | 0.027       | 372836                   |                  |      |                             |                                   |                     |                |
| CXCL2      | 0.027       | 357858                   |                  |      |                             |                                   |                     |                |
| AC093677.2 | 0.018       | 417035                   |                  |      |                             |                                   |                     |                |
| ANKRD17    | 0.009       | 482540                   |                  |      |                             |                                   |                     |                |
| AC053527.1 | 0.009       | 482129                   |                  |      |                             |                                   |                     |                |

V2G score was calculated for the purpose of fine-mapping. V2G = assigned variant to gene score based on Variant-to-Gene(V2G) pipeline ([genetics-docs.opentargets.org](http://genetics-docs.opentargets.org)) of four main data types (QTLs, chromatin interaction experiments, VEP, and TSS).

**b**

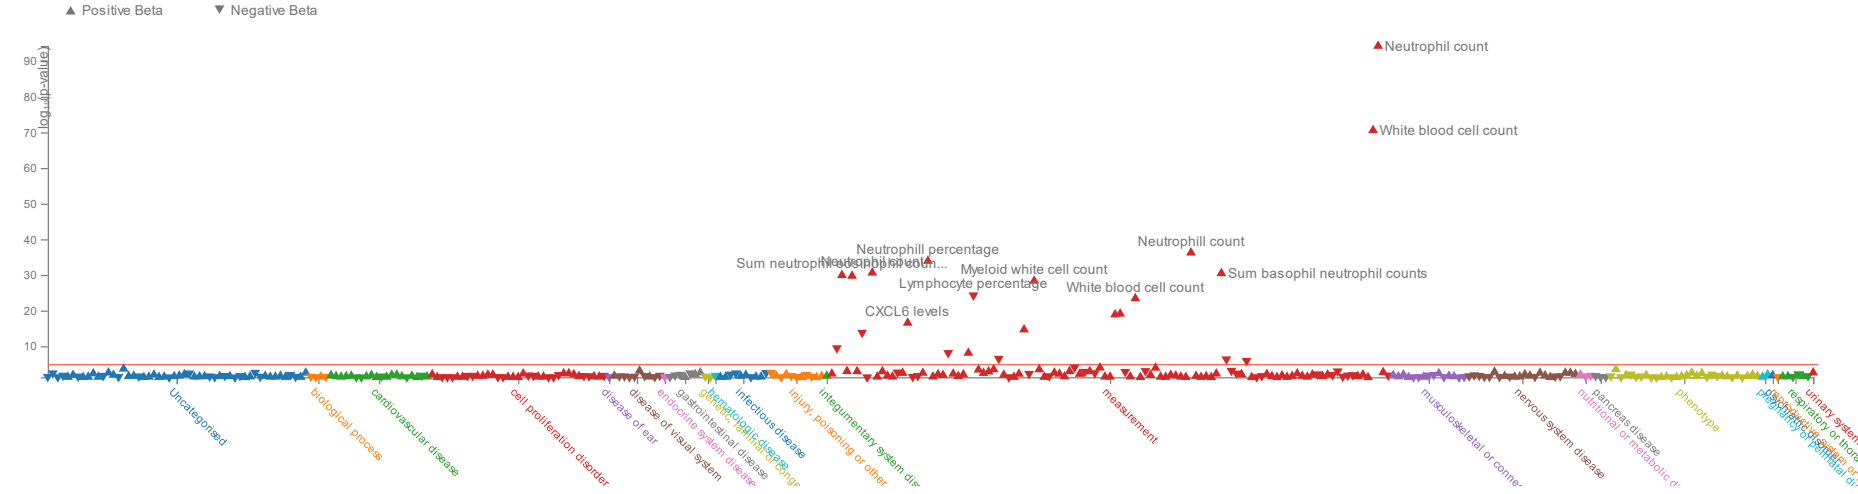

**eFigure2. LOVE plot to display the improvement in standardized mean differences after propensity score matching for index age and sex with case:control ratio controlled at 1:5 or 1:10.** Age and sex were identified as confounding factors for the association between genetic/nongenetic risk factors and CDI (see result section). They were selected as covariates in a Logistic Regression model to create propensity scores (R MatchIt package). We chose “nearest neighbor matching without replacement” to create a more balanced case:control ratio. The love plot (R cobalt package) demonstrated how well the improvement of standardized mean differences deviated from zero for each covariate before and after PSM in MyCode (left) and nonMyCode (right) samples after PSM at 1:5 (upper row) or 1:10 (bottom row).

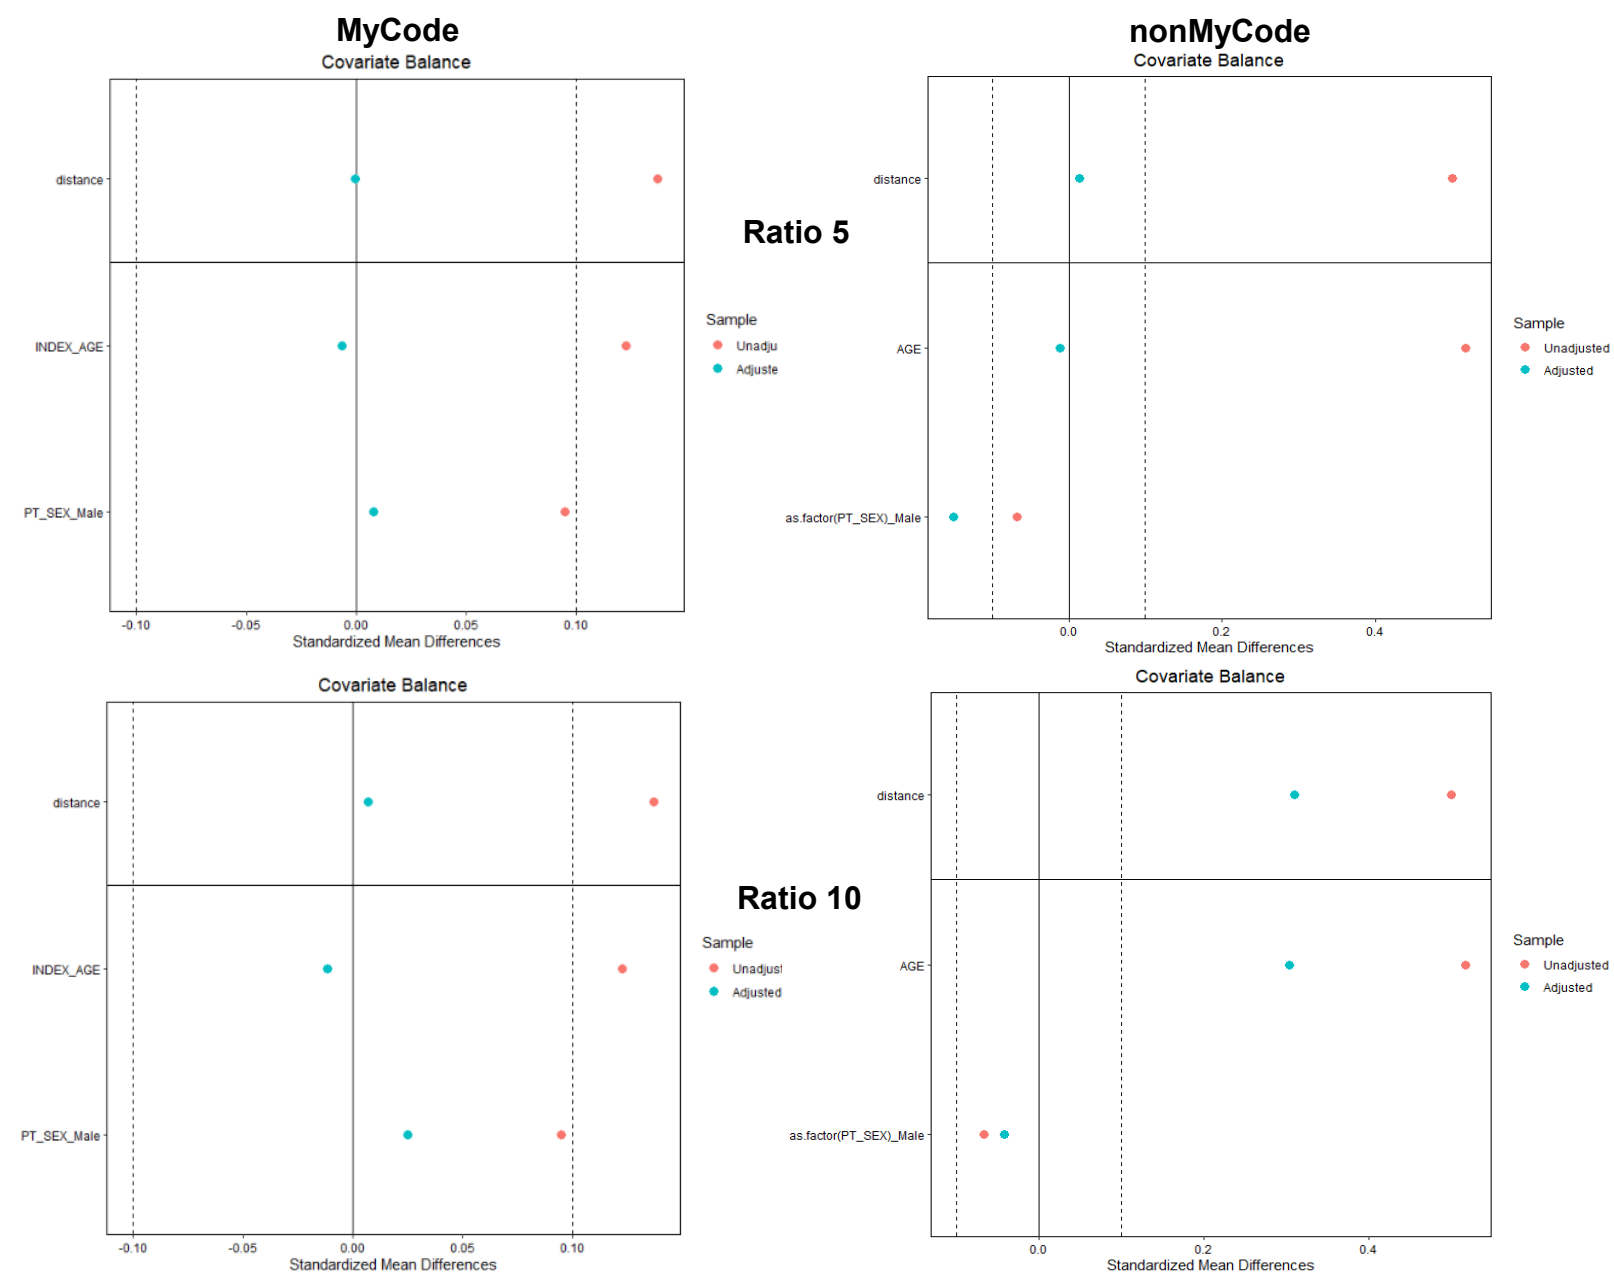

Supplement: MOESM1 [file 41598_2023_41753_MOESM1_ESM.pdf]
